# Supplementary material for: Electromagnetic Transmitter-Based Prostate Gating for Dose-Escalated Linac-Based Stereotactic Body Radiation Therapy: An Evaluation of Intrafraction Motion
Source: MDPI journal article supplement (doi:10.3390/curroncol31020072), 2024-02-09
Supplement: s1 [file s1]

# Supplementary material

**Table S1.** Median, min and max number of XVI CBCT during the total treatment time, during the setup phase and during the irradiation phase (data on 31 patients, 155 sessions).

|                                             | Median | Min | Max |
|---------------------------------------------|--------|-----|-----|
| <b>Overall treatment (Setup + delivery)</b> | 1      | 1   | 11  |
| <b>Before delivery</b>                      | 1      | 1   | 10  |
| <b>During delivery</b>                      | 0      | 0   | 5   |

**Table S2.** Mean value with SD, median, min and Max for total treatment duration in our “per patient” analysis. Legend: min = minutes ; s = seconds.

|                         | Mean value | SD        | Median   | Min     | Max        |
|-------------------------|------------|-----------|----------|---------|------------|
| <b>Whole population</b> | 12min44s   | ±9min39s  | 10min31s | 5min18s | 1h05min28s |
| <b>Group A</b>          | 8min10s    | ± 3min03s | 7min48s  | 5min47s | 18min11s   |
| <b>Group B</b>          | 11min08s   | ± 9min19s | 7min50s  | 5min18s | 58min28s   |
| <b>Group C</b>          | 14min12s   | ±9min47s  | 11min48s | 5min41s | 1h05min28s |

**Table S3.** Median, Minimum, and Maximum number of XVI CBCT for the 3 identified Groups.

| Group                            | Median | Minimum | Maximum |
|----------------------------------|--------|---------|---------|
| <b>Whole population</b>          | 1      | 1       | 11      |
| <b>Group B</b>                   | 1      | 1       | 10      |
| <b>Group C, global treatment</b> | 2      | 1       | 11      |
| <b>Group C, setup phase</b>      | 1      | 1       | 6       |
| <b>Group C, delivery phase</b>   | 0      | 0       | 5       |
